# Supplementary material for: The Transcriptome of the Human Pathogen Trypanosoma brucei at Single-Nucleotide Resolution
Source: PubMed Central journal article supplement (PMC2936537; doi:10.1371/journal.ppat.1001090), 2010-09-09
Supplement: ppat.1001090.s001.pdf [file ppat.1001090.s001.pdf]

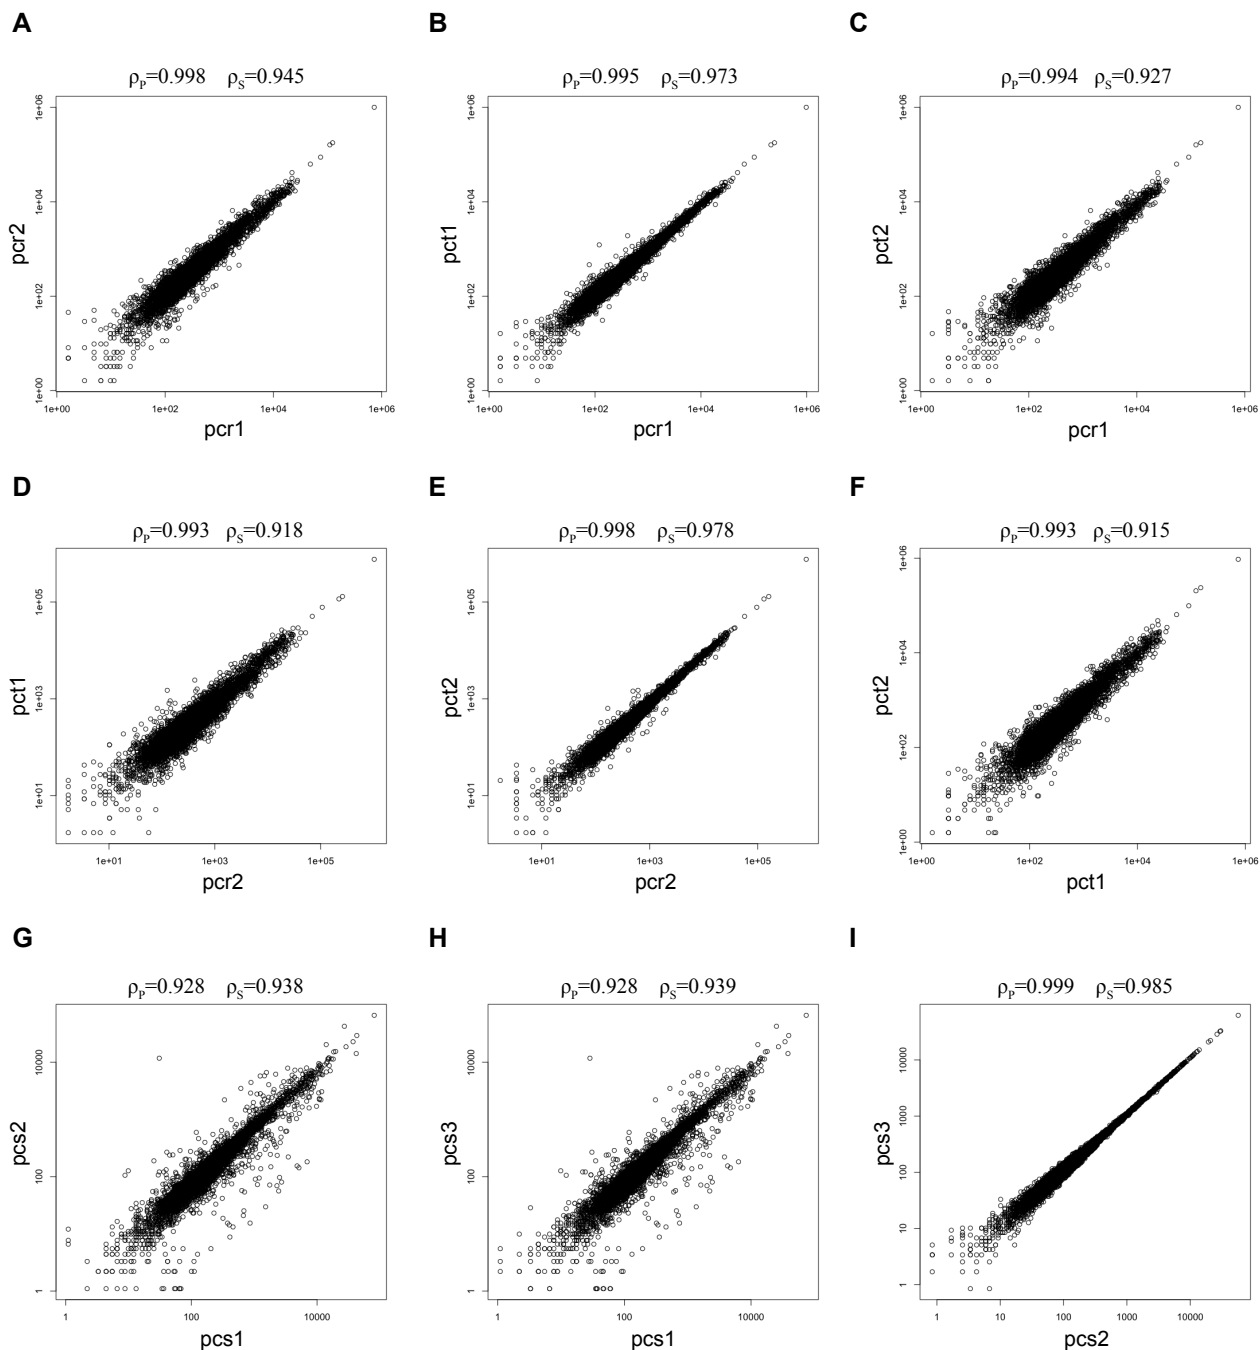

**Figure S1. Comparison of technical and biological replica data sets.** (A-I) Transcript abundance measures were derived from the number of reads (not including end-reads) that align within a 500-nucleotide window at the 5' end of the transcript (for the SL-libraries) or at the 3' end (for the poly-A enriched libraries; random primed or oligo(dT) primed). Shown above each graph are the Pearson's correlation coefficient ( $\rho_p$ ) and the Spearman's rank correlation coefficient ( $\rho_s$ ). *Pcr*, *pct* and *pcs* indicate libraries from procyclic cells prepared with random primers, oligo(dT) primer and SL primer (for the second cDNA strand), respectively.
