# Supplementary material for: The Transcriptome of the Human Pathogen Trypanosoma brucei at Single-Nucleotide Resolution
Source: PubMed Central journal article supplement (PMC2936537; doi:10.1371/journal.ppat.1001090), 2010-09-09
Supplement: ppat.1001090.s002.pdf [file ppat.1001090.s002.pdf]

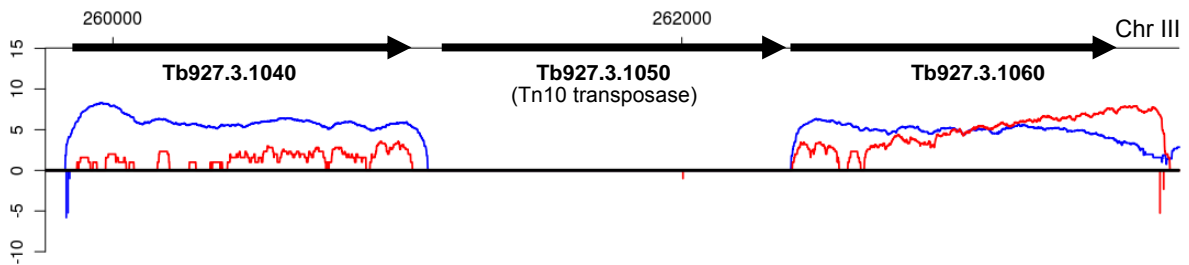

**Figure S2. Accuracy of alignment of sequence reads to the *T. brucei* reference genome.** Shown is the overlay of the number of reads ( $\log_2$ ) from 5'-end- (blue) and 3'-end-enriched (red) libraries aligning to ~4kb window on chromosome III that contains the ORF for Tn10 transposase (Tb927.3.1050). Numbers of end-reads [SL-containing, blue; poly(A)-containing, red] are also shown ( $-\log_2$ ). ORFs are represented by black arrows. No reads align to the Tn10 transposase ORF, which clearly is inserted within the sequence of a single transcript that covers both Tb927.3.1040 and Tb927.3.1060 (both currently annotated as interrupted, conserved hypothetical protein pseudogenes). According to GeneDB ([www.genedb.org](http://www.genedb.org)), the Tn10 insertion is an artifact from BAC construction and is not present in the *Trypanosoma brucei brucei* strain 927 genomic DNA or other BACs covering this region [1].
