# Supplementary material for: The Transcriptome of the Human Pathogen Trypanosoma brucei at Single-Nucleotide Resolution
Source: PubMed Central journal article supplement (PMC2936537; doi:10.1371/journal.ppat.1001090), 2010-09-09
Supplement: ppat.1001090.s012.pdf [file ppat.1001090.s012.pdf]

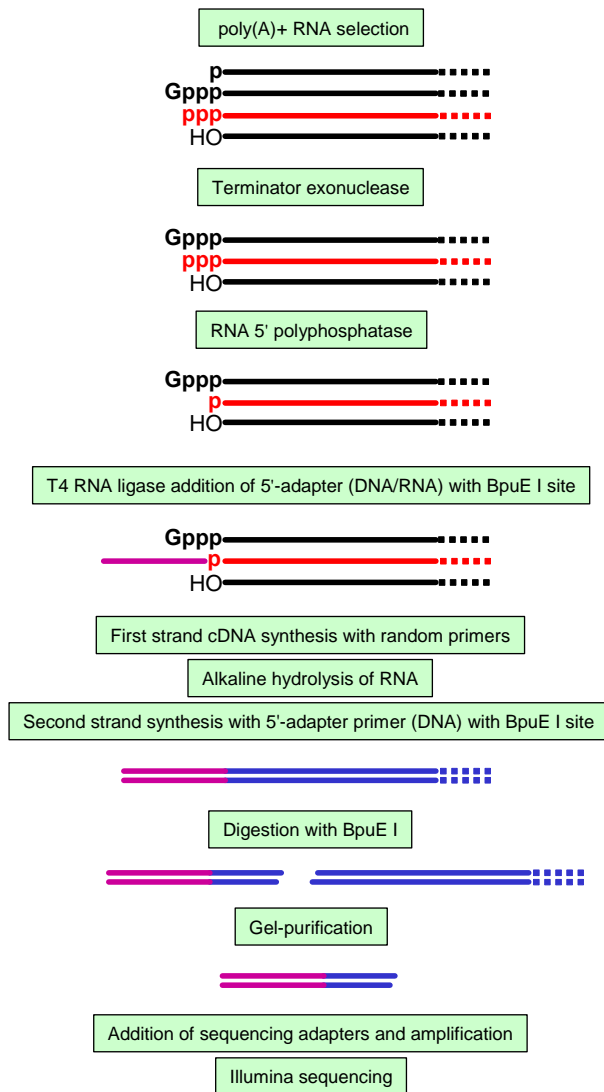

**Figure S12. Outline of the protocol for generation of 5'-triphosphate-end-enriched library for RNA-seq.**
