# Supplementary material for: The Transcriptome of the Human Pathogen Trypanosoma brucei at Single-Nucleotide Resolution
Source: PubMed Central journal article supplement (PMC2936537; doi:10.1371/journal.ppat.1001090), 2010-09-09
Supplement: ppat.1001090.s015.pdf [file ppat.1001090.s015.pdf]

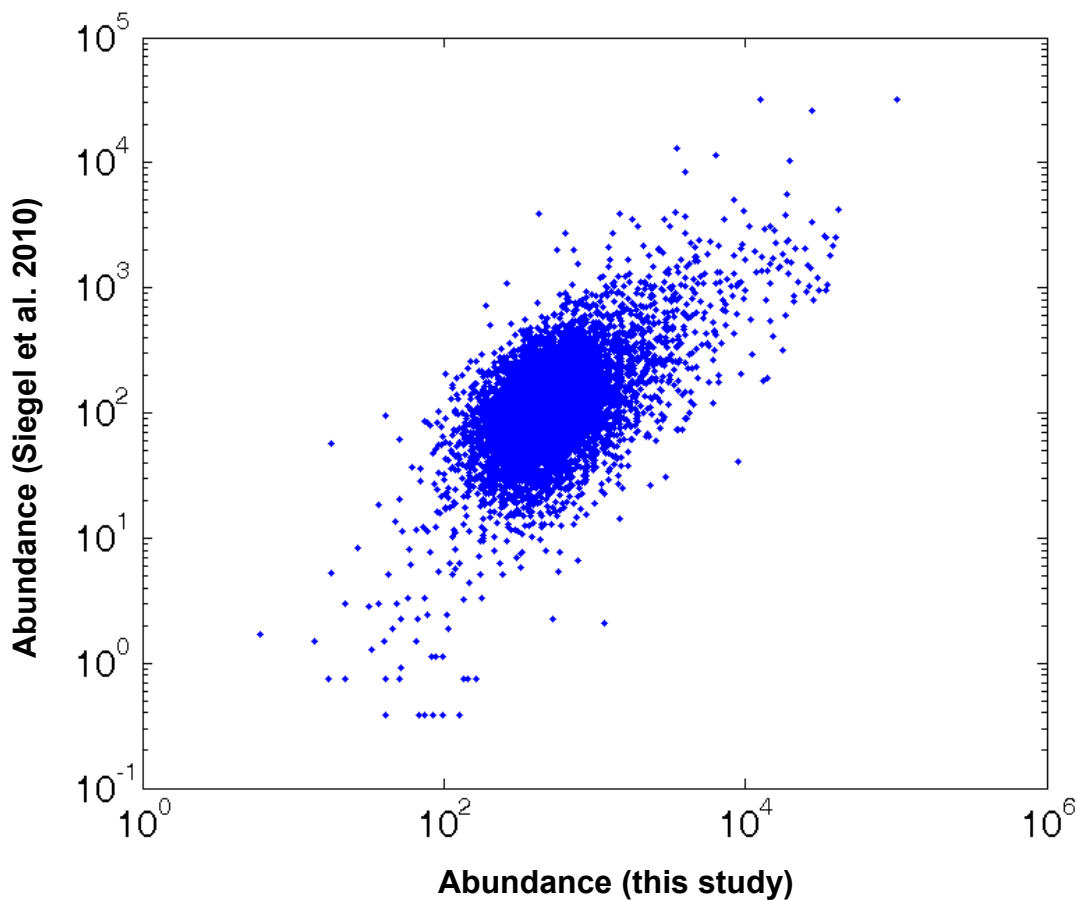

**Figure S15. Abundance comparison between the data set in this study and that in [17].** - Pairwise (gene-by-gene) comparison of RNA-Seq-based gene abundance reported previously with those derived from the current study (tabulated in Table S6). Correlation coefficients between the sets are 0.697 (Pearson) and 0.483 (Spearman).
